# Supplementary material for: Synthesis and characterisation of trigonal C2-chiral di- and tetra-substituted bis(oxazoline) alkyl zinc complexes and their reactivity towards protic reagents
Source: Royal Society of Chemistry journal article supplement (doi:10.1039/c0dt01252a), 2011-01-01
Supplement: c0dt01252a.pdf [file c0dt01252a.pdf]

## **Supplementary Material**

### **Synthesis and Characterisation of Trigonal $C_2$ -Chiral di- and tetra-substituted Bis(Oxazoline) Alkyl Zinc Complexes and Their Reactivity Towards Protic Reagents**

**Erwan Le Roux,\* Nicolas Merle, Karl W. Törnroos**

*Department of Chemistry, University of Bergen, Allégaten 41, N-5007, Bergen, Norway. Fax: +47 555 89490; Tel: +47 555 89854; E-mail: Erwan.LeRoux@kj.uib.no*

**X-ray Crystallography and Crystal Structure Determination.** *Crystal data:* for **1b**: from toluene.  $C_{21}H_{22}N_2O_2Zn$ ,  $M = 399.78$ , orthorhombic, space group  $P2_12_12_1$ ,  $a = 5.4113(7)$ ,  $b = 21.983(3)$ ,  $c = 31.330(4)$  Å,  $V = 3726.9(8)$  Å<sup>3</sup>,  $Z = 8$ ,  $\rho_{\text{calc}} = 1.425$  g.cm<sup>-3</sup>,  $F(000) = 1664$ ,  $\mu(\text{Mo-K}\alpha) = 1.335$  mm<sup>-1</sup>,  $\lambda = 0.71073$  Å,  $T = 103(2)$  K. The 42494 reflections measured on a *Bruker* APEXII Ultra CCD area detector yielded 6679 unique data ( $\theta_{\text{max}} = 25.15^\circ$ ,  $R_{\text{int}} = 0.0715$ ) [6227 observed reflections ( $I > 2\sigma(I)$ ).  $R1 = 0.0376$ ,  $wR2 = 0.0908$ . Flack parameter: 0.003(10). CCDC reference number 791883. for **2b**: from toluene.  $C_{38}H_{34}N_4O_4Zn$ ,  $M = 676.06$ , orthorhombic, space group  $C222_1$ ,  $a = 10.3033(7)$ ,  $b = 16.6104(11)$ ,  $c = 75.385(5)$  Å,  $V = 12901.5(15)$  Å<sup>3</sup>,  $Z = 16$ ,  $\rho_{\text{calc}} = 1.392$  g.cm<sup>-3</sup>,  $F(000) = 5632$ ,  $\mu(\text{Mo-K}\alpha) = 0.809$  mm<sup>-1</sup>,  $\lambda = 0.71073$  Å,  $T = 100(2)$  K. The 110073 reflections measured on a *Bruker* APEXII Ultra CCD area detector yielded 19733 unique data ( $\theta_{\text{max}} = 30.59^\circ$ ,  $R_{\text{int}} = 0.0422$ ) [19509 observed reflections ( $I > 2\sigma(I)$ ).  $R1 = 0.0673$ ,  $wR2 = 0.1484$ . Flack parameter: 0.088(10). CCDC reference number 791885.

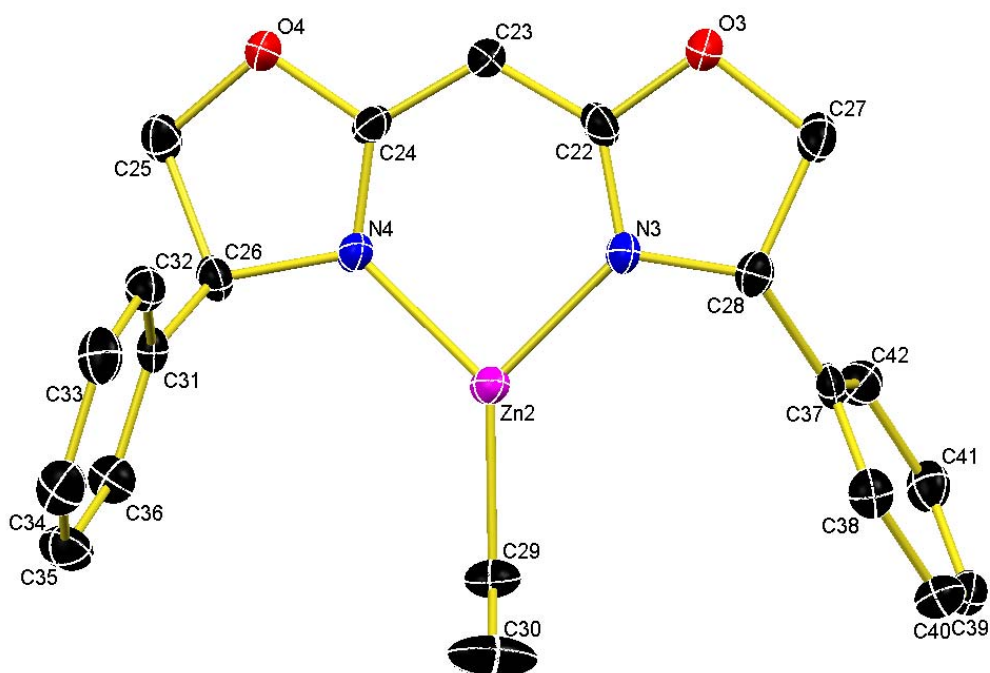

**Figure S1** Molecular structure of (<sup>Ph,H</sup>BOX)ZnEt (**1b**). Selected bond lengths (Å) and angles (°) for the 2<sup>nd</sup> conformer of **1b**: Zn(2)-C(29) 1.961(3), Zn(2)-N(3) 1.967(3), Zn(2)-N(4) 1.971(2), N(3)-C(22) 1.323(4), N(4)-C(24) 1.316(4), C(22)-C(23) 1.386(5), C(24)-C(23) 1.394(5), N(3)-Zn(2)-N(4) 94.00(10), N(4)-Zn(2)-C(29) 132.22(13), N(3)-Zn(2)-C(29) 133.57(13), C(22)-C(23)-C(24) 121.9(3), C(23)-Zn(1)-C(29) 176.99(13).

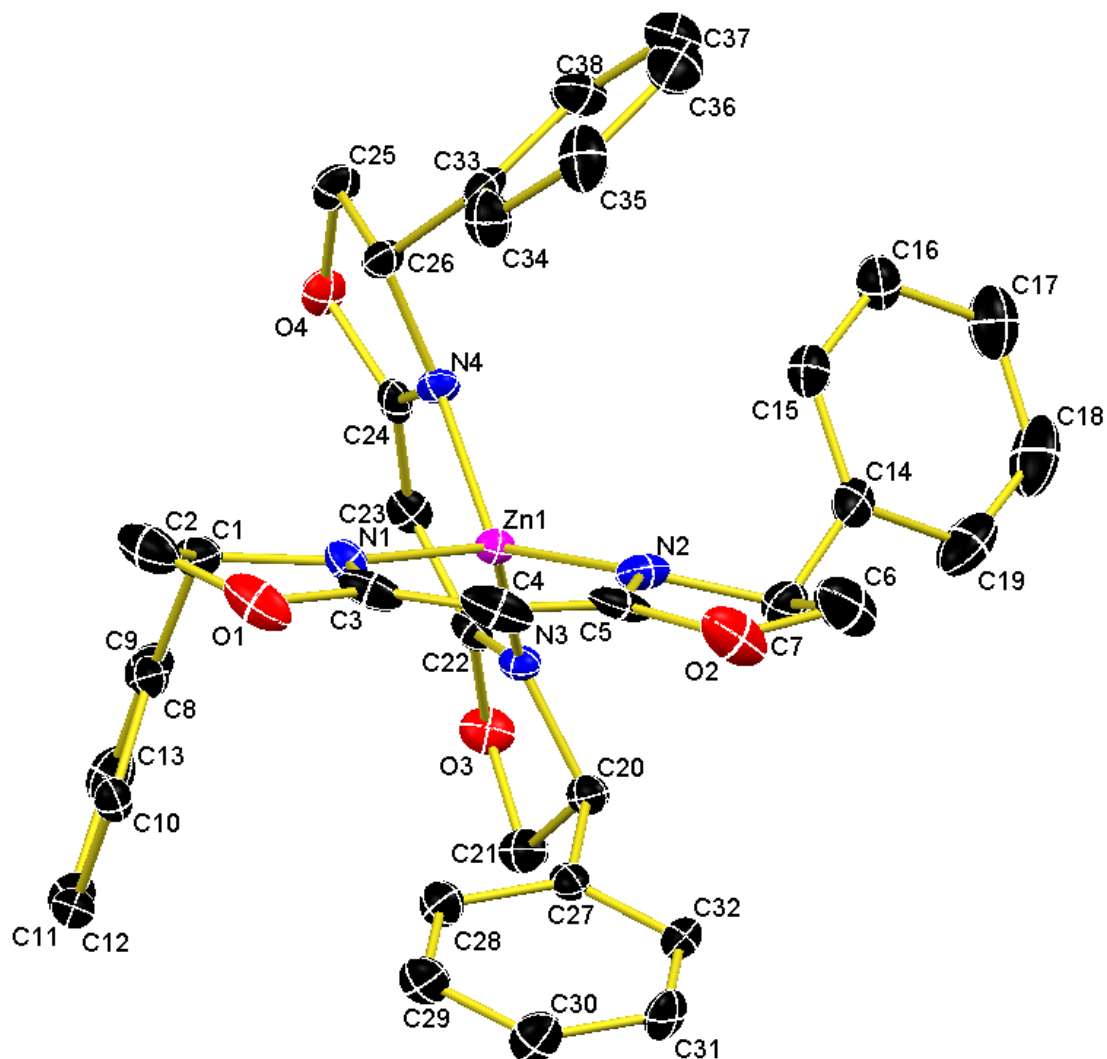

**Figure S2** Molecular structure of (<sup>Ph,H</sup>BOX)<sub>2</sub>Zn (**2b**). Hydrogen atoms and toluene molecule are omitted for clarity. Selected bond lengths (Å) and angles (°) for the 1<sup>st</sup> conformer of **2b**: Zn(1)-N(1) 1.998(3), Zn(1)-N(2) 1.964(3), Zn(1)-N(3) 1.972(3), Zn(1)-N(4) 1.1.988(3), N(1)-C(3) 1.312(5), N(2)-C(5) 1.317(5), N(3)-C(22) 1.318(5), N(4)-C(24) 1.317(5), C(3)-C(4) 1.400(7), C(4)-C(5) 1.390(7), C(22)-C(23) 1.401(5), C(23)-C(24) 1.392(6), N(1)-Zn(1)-N(2) 95.39(14), N(3)-Zn(1)-N(4) 94.00(13), N(1)-Zn(1)-N(4) 102.56(14), N(1)-Zn(1)-N(3) 126.30(13), N(2)-Zn(1)-N(3) 110.59(14), N(2)-Zn(1)-N(4) 131.71(14), C(3)-C(4)-C(5) 123.9(4), C(22)-C(23)-C(24) 121.7(3).

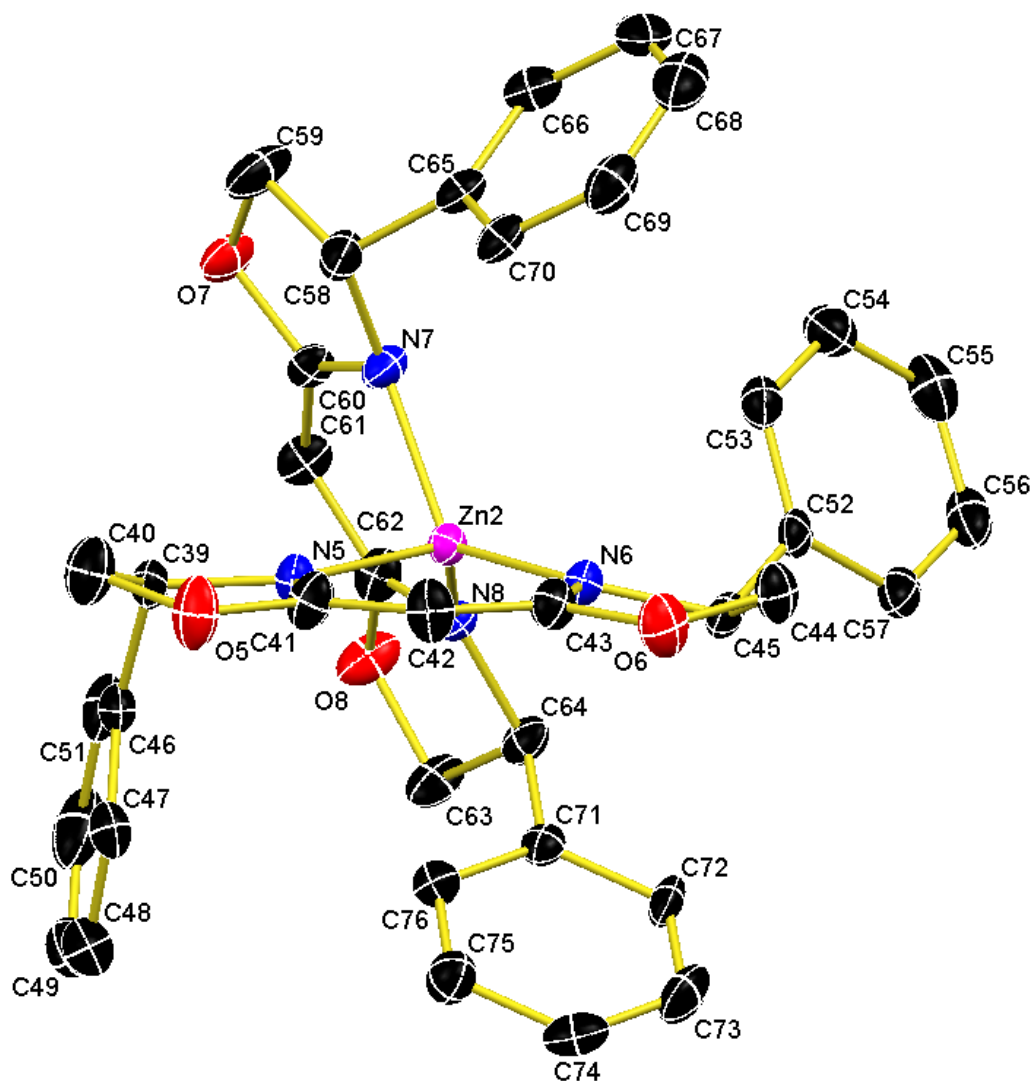

**Figure S3** Molecular structure of  $(^{\text{Ph,H}}\text{BOx})_2\text{Zn}$  (**2b**). Hydrogen atoms and the toluene molecule are omitted for clarity. Selected bond lengths (Å) and angles ( $^\circ$ ) for the 2<sup>nd</sup> conformer of **2b**: Zn(2)-N(5) 2.006(3), Zn(2)-N(6) 1.953(3), Zn(2)-N(7) 2.017(4), Zn(2)-N(8) 1.966(3), N(5)-C(41) 1.297(5), N(6)-C(43) 1.325(5), N(7)-C(60) 1.318(5), N(8)-C(62) 1.373(5), C(41)-C(42) 1.412(6), C(42)-C(43) 1.392(6), C(60)-C(61) 1.397(6), C(61)-C(62) 1.388(6), N(5)-Zn(2)-N(6) 94.22(14), N(7)-Zn(2)-N(8) 92.43(14), N(5)-Zn(1)-N(7) 97.45(15), N(5)-Zn(1)-N(8) 122.56(14), N(6)-Zn(2)-N(7) 129.27(14), N(6)-Zn(2)-N(8) 121.35(14), C(41)-C(42)-C(43) 121.1(4), C(60)-C(61)-C(62) 121.4(4).

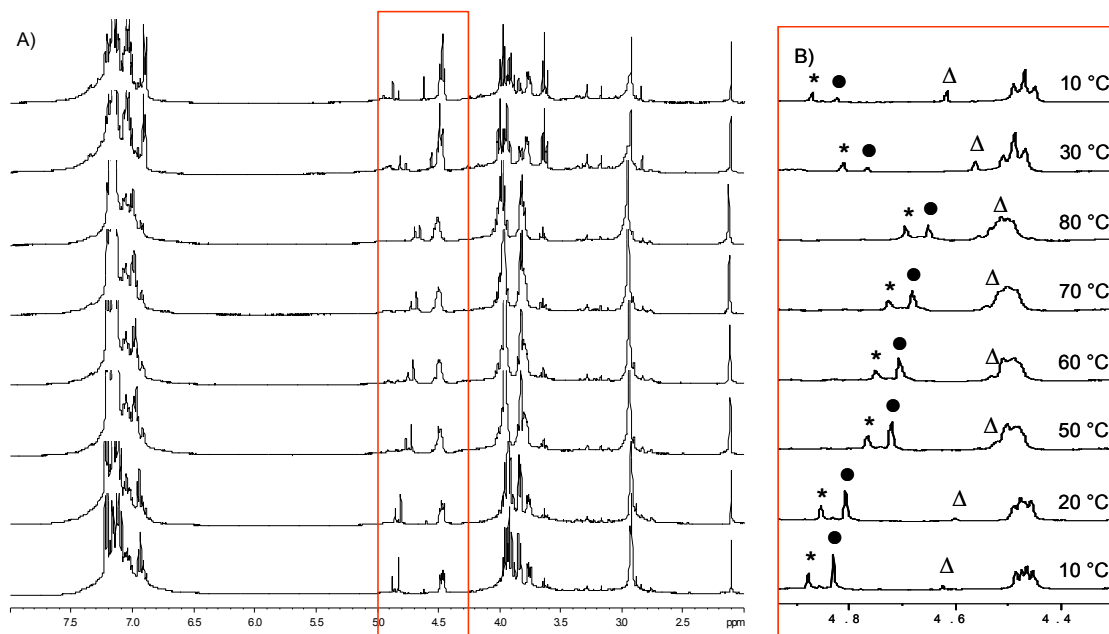

**Figure S4** A) Variable temperature  $^1\text{H}$  NMR spectra (400.13 MHz, in benzene- $d_6$ ) of monometallic ( $^{\text{Ph,H}}\text{BOX}$ )Zn(OMe) **4b** (\*), bimetallic [ $^{\text{Ph,H}}\text{BOX}$ ]Zn( $\mu$ -OMe)] $_2$  **4b'** (●) and ( $^{\text{Ph,H}}\text{BOX}$ ) $_2$ Zn **2b** ( $\Delta$ ) species. B) Zoom in the methylenic ( $\text{HC}_1$ ) area [5.0-4.3 ppm].

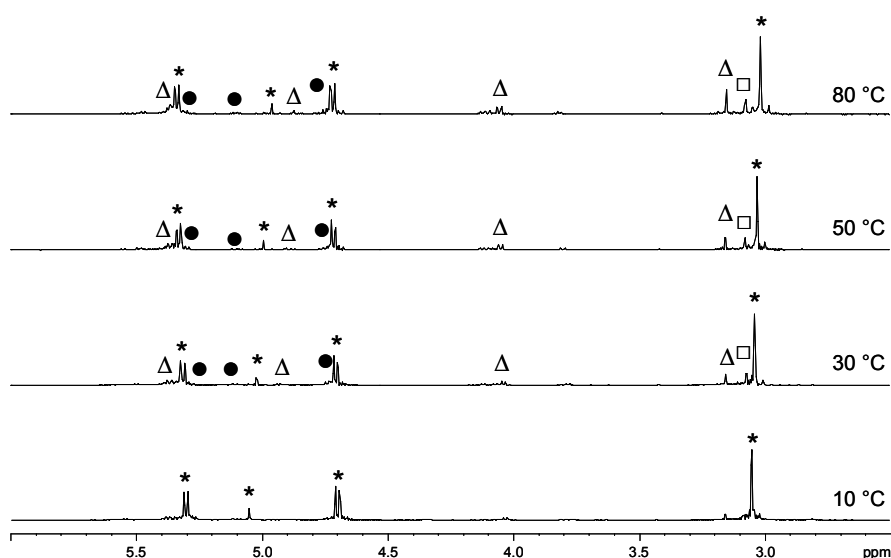

**Figure S5** Variable temperature  $^1\text{H}$  NMR spectra of (400.13 MHz, in benzene- $d_6$ ) monometallic ( $^{\text{PhPh}}\text{BOX}$ )Zn(OMe) **4c** (\*) and formation of side products increasing with temperature: ( $^{\text{PhPh}}\text{BOX}$ ) $_2$ Zn **2c** (●),  $[\text{Zn}(\text{OMe})_2]_n$  ( $\square$ ) and ( $^{\text{PhPh}}\text{BOX}$ )Zn(OMe) aggregates ( $\Delta$ ).

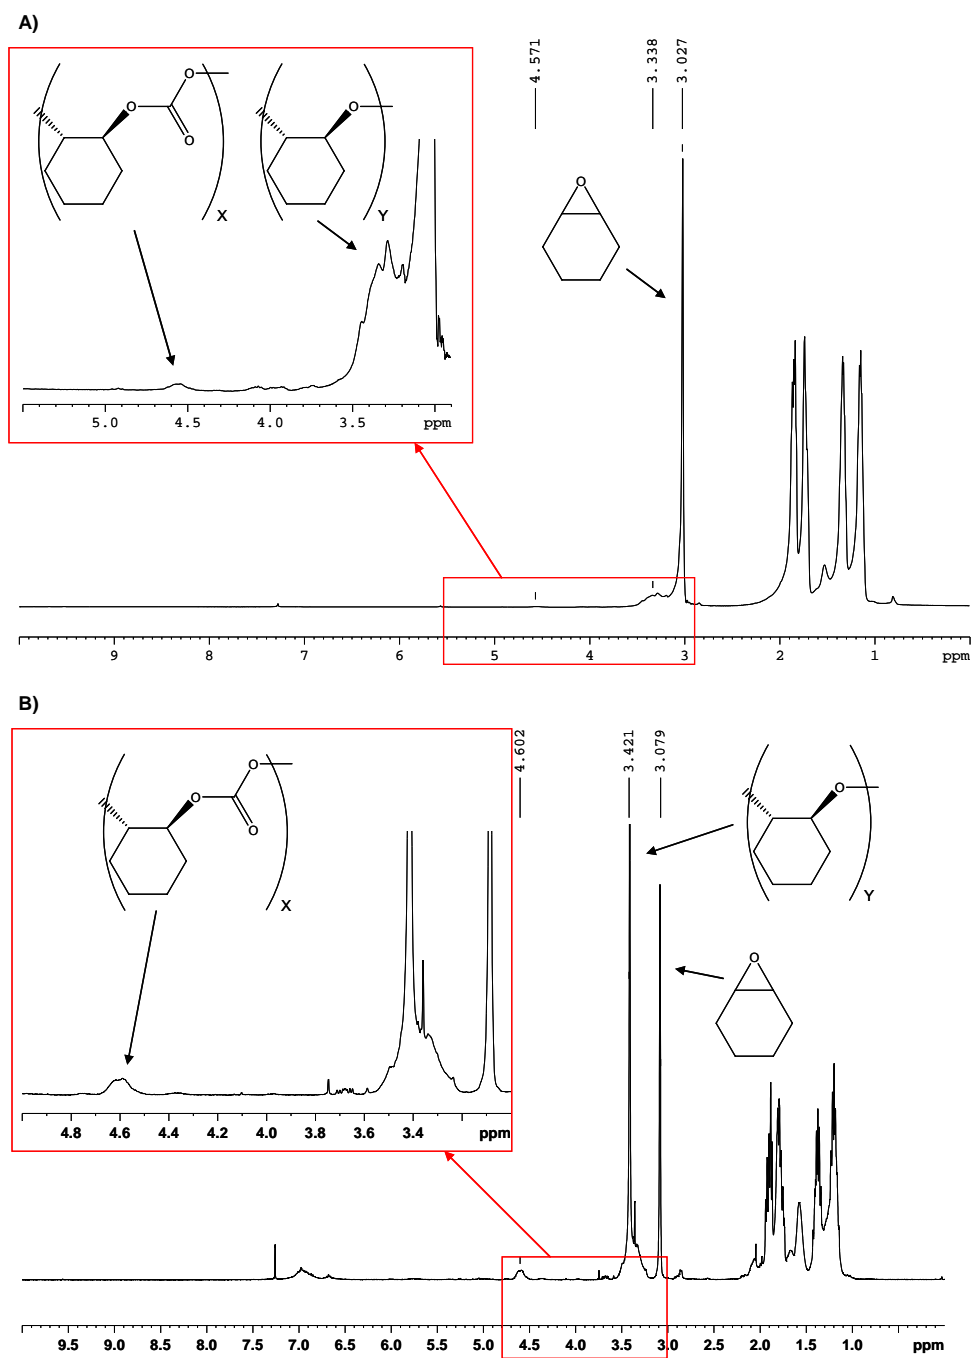

**Figure S6**  $^1\text{H}$  NMR spectra (in  $\text{CDCl}_3$ ) of the polymers produced after 24 h at  $50\text{ }^\circ\text{C}$  for the copolymerization of  $\text{CO}_2/\text{CHO}$  by  $[(^{\text{Ph,Ph}}\text{BOX})\text{Zn}(\mu\text{-}\eta^2\text{-OAc})_2]$  **3c'** and **2c**. A)  $^1\text{H}$  NMR spectrum of the aliquot taken from the crude material. B)  $^1\text{H}$  NMR spectrum after quenching with MeOH and dried *in vacuo*.
